# Supplementary material for: Two cationic iron-based crystalline porous materials for encapsulation and sustained release of 5-fluorouracil
Source: Royal Society of Chemistry journal article supplement (doi:10.1039/d2dt01854c), 2022-01-01
Supplement: d2dt01854c1.pdf [file d2dt01854c1.pdf]

# Two cationic iron-based crystalline porous materials for encapsulating and sustained release of 5-fluorouracil

Xi-yu Sun<sup>a</sup>, Hong-jing Zhang<sup>a</sup>, Qian Sun<sup>\*a</sup> and En-qing Gao<sup>b</sup>

Department of chemistry, School of Chemistry and Molecular Engineering, East China Normal University, Shanghai 200241, P. R. China;

Email: xsun@chem.ecnu.edu.cn

## 1. The synthesis and characterization of materials.

Terephthalic acid (H<sub>2</sub>BDC) (34.8 mg), 2, 4, 6-tris(4-pyridyl)-1,3,5-triazine (TPT) (21.9 mg) and Fe(ClO<sub>4</sub>)<sub>3</sub>·H<sub>2</sub>O (78.3 mg) were added to 5mL DMF according to the molar ratio of 2:1:1, sonicated for 20 min until fully dissolved. Then transfer the solution to a reaction kettle heated in an oven at 120° C for five days. The temperature was slowly cooled down to obtain yellow microcrystalline. Elemental analysis (%) Calcd for CPM-83 (Fe<sub>3</sub>O(BDC)<sub>3</sub>(TPT)](ClO<sub>4</sub>): C, 46.38; H, 2.22; N, 7.73. Found: C, 45.67; H, 3.34; N, 7.44. Elemental analysis (%) for CPM-85, according to the formula of [Fe<sub>3</sub>O(BPDC)<sub>3</sub>(TPT)](ClO<sub>4</sub>)(DMF): calcd C, 54.47; H, 3.12; N, 7.06. Found: C, 53.95; H, 3.37; N, 7.63.

## 2. The characterization of materials.

### 2.1 X-ray powder diffraction

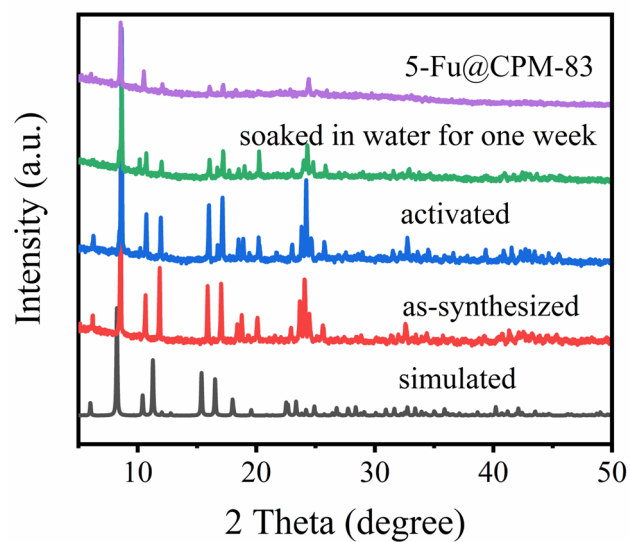

Figure S1 X-ray powder diffraction of CPM-83, activated CPM-83, CPM-83 soaked in water for one week, 5-Fu@CPM-83

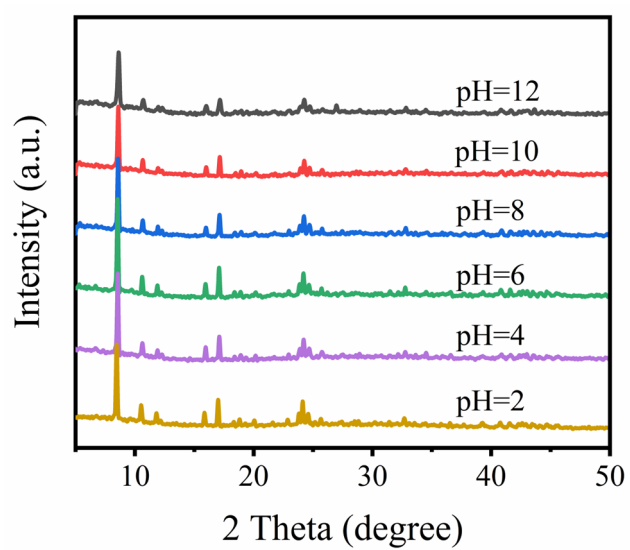

Figure S2 X-ray powder diffraction of CPM-83 in different pH solutions

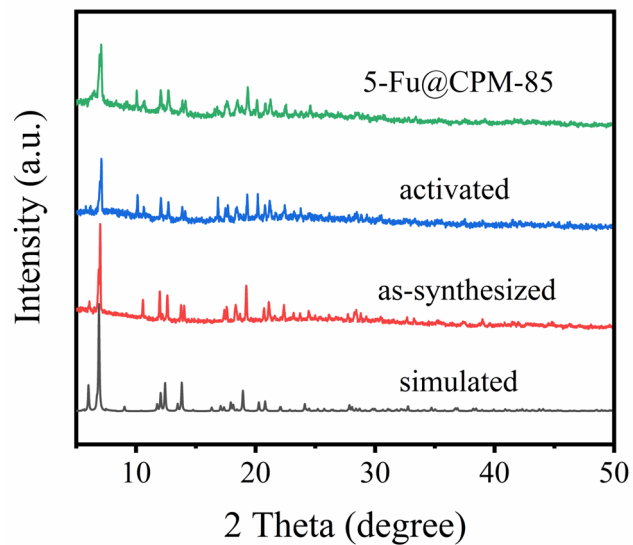

Figure S3 X-ray powder diffraction of CPM-85, activated CPM-85 and 5-Fu@CPM-85

## 2.2 Scanning Electron Microscope

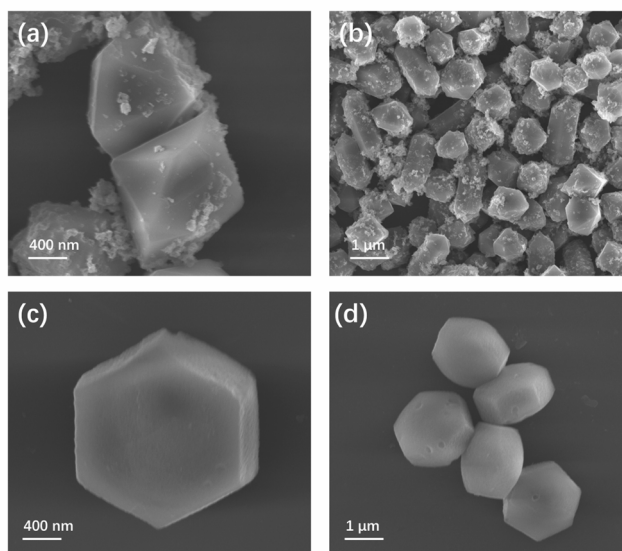

Figure S4 Scanning Electron Microscope of CPM-83 (a) (b), CPM-85 (c) (d)

### 2.3 Thermogravimetric analysis

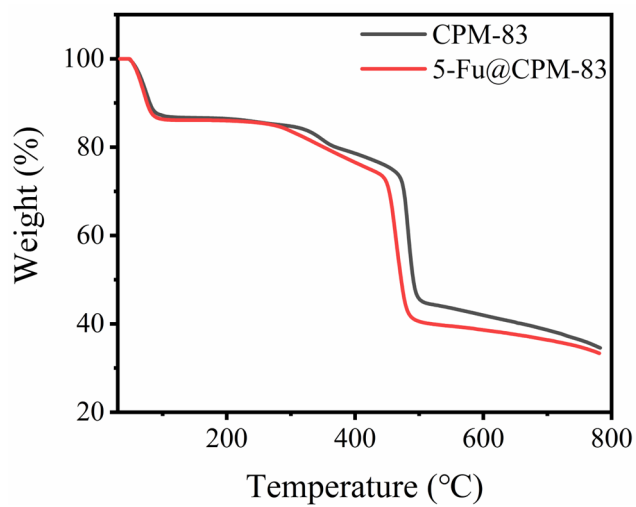

Figure S5 Thermogravimetric analysis of CPM-83 and 5-Fu@CPM-83

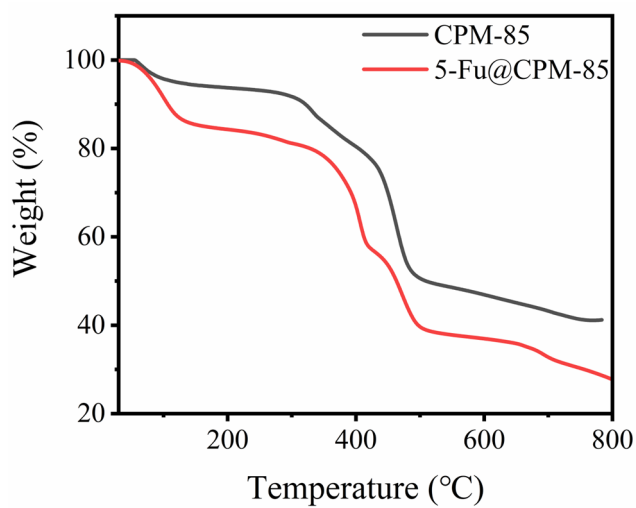

Figure S6 Thermogravimetric analysis of CPM-85 and 5-Fu@CPM-85

## 2.4 Infrared spectra characterization

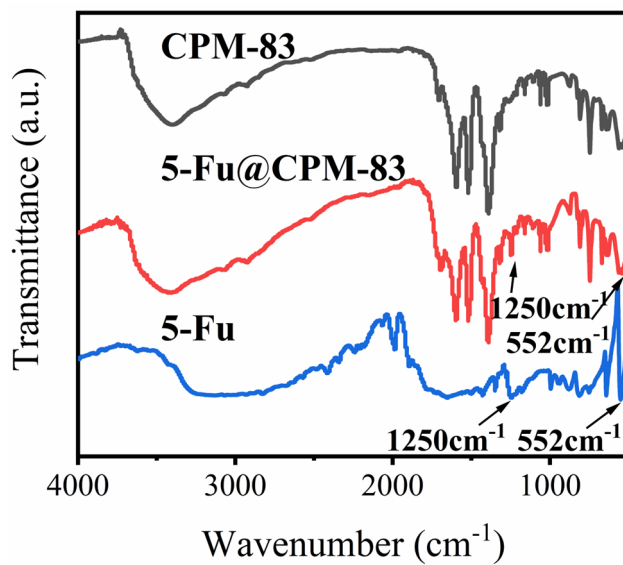

Figure S7 Infrared spectra of 5-Fu, CPM-83, 5-Fu@CPM-83

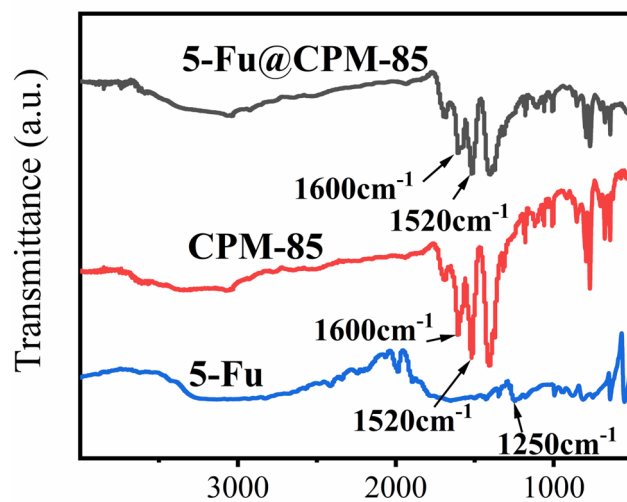

Figure S8 Infrared spectra of 5-Fu, CPM-85, 5-Fu@CPM-85

### 3. Standard curve of 5-Fu.

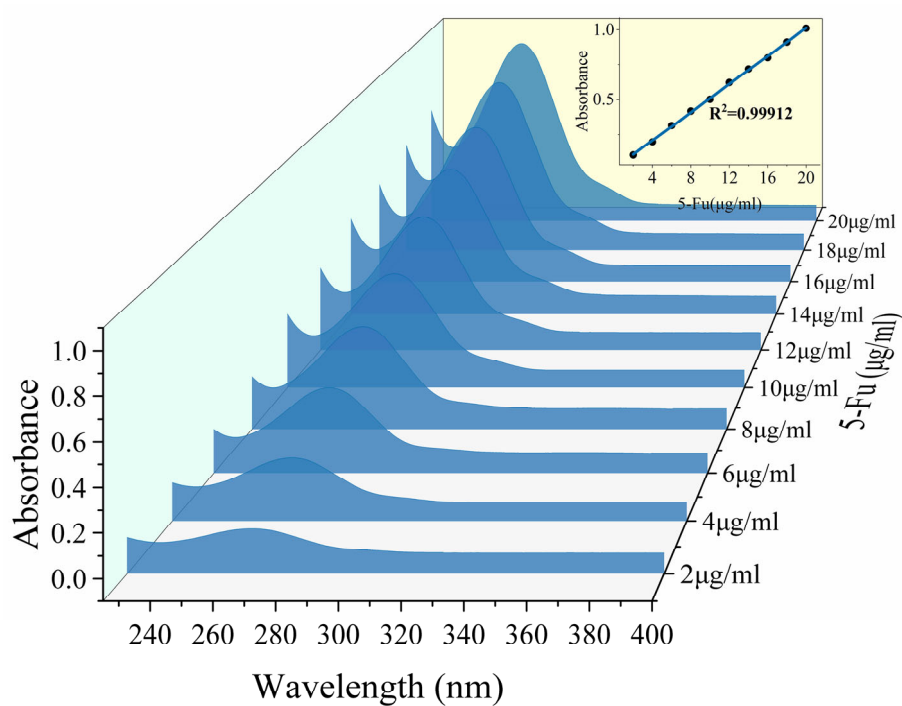

Figure S9 Standard curve of 5-Fu in PBS solution

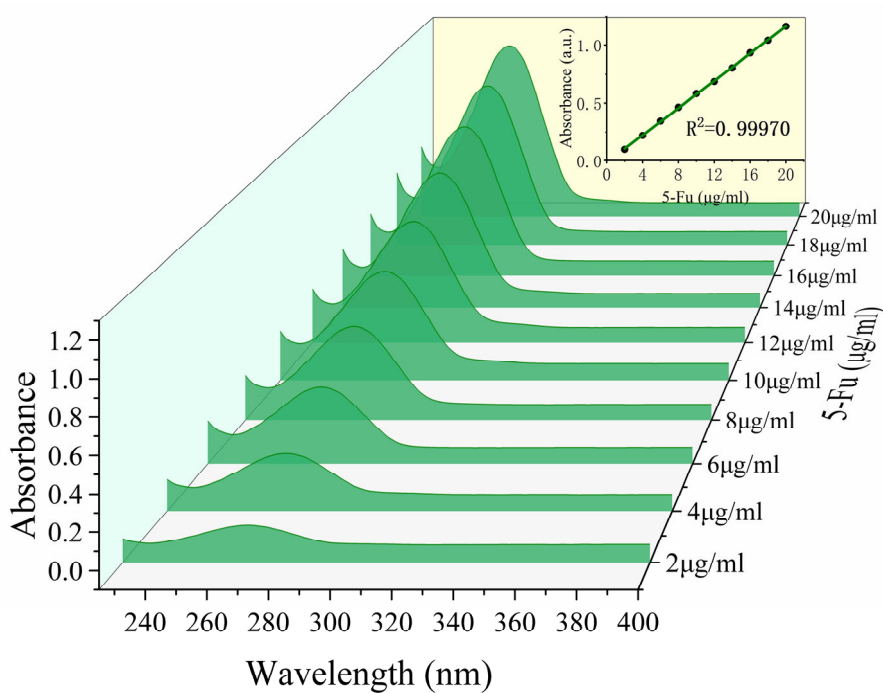

Figure S10 Standard curve of 5-Fu in ethanol solution

#### 4. Encapsulation mechanism

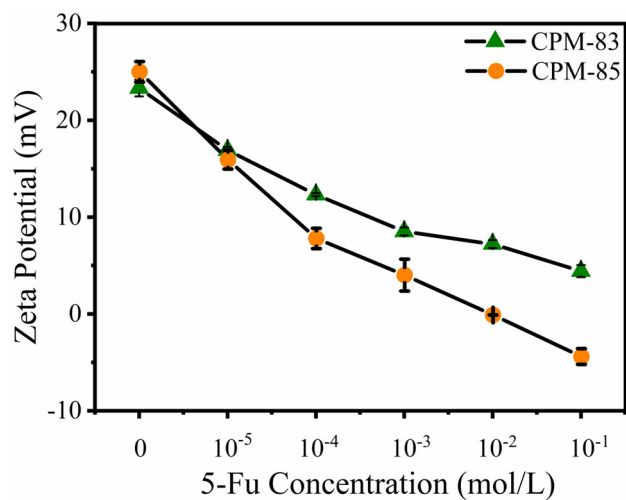

Figure S11 Zeta potential of CPM-83 and CPM-85 under different concentrations of 5-Fu

#### 5. Kinetic model fitting

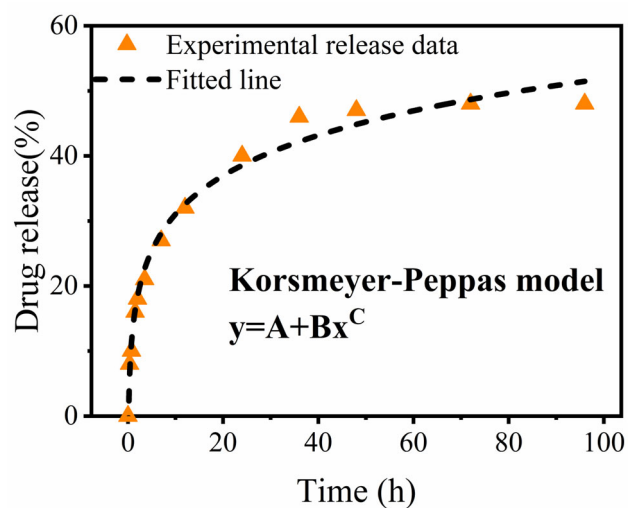

Figure S12 Pharmacokinetic simulation of 5-Fu@CPM-83 by Korsmeyer-Peppas model

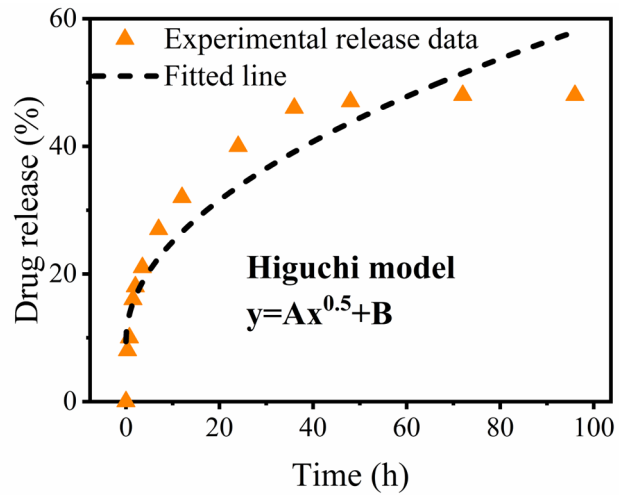

Figure S13 Pharmacokinetic simulation of 5-Fu@CPM-83 by Higuchi model

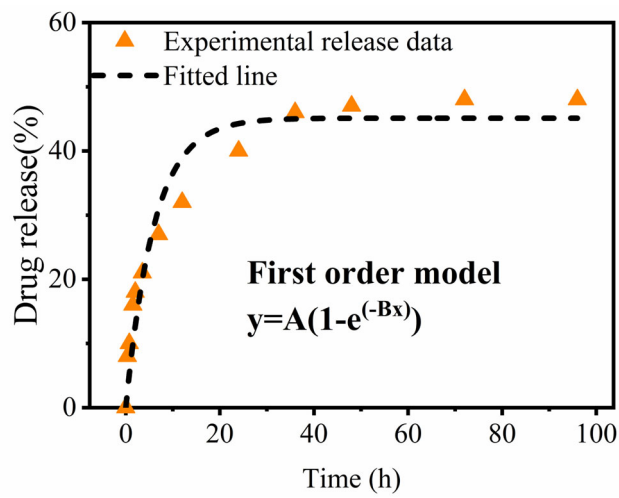

Figure S14 Pharmacokinetic simulation of 5-Fu@CPM-83 by first order model

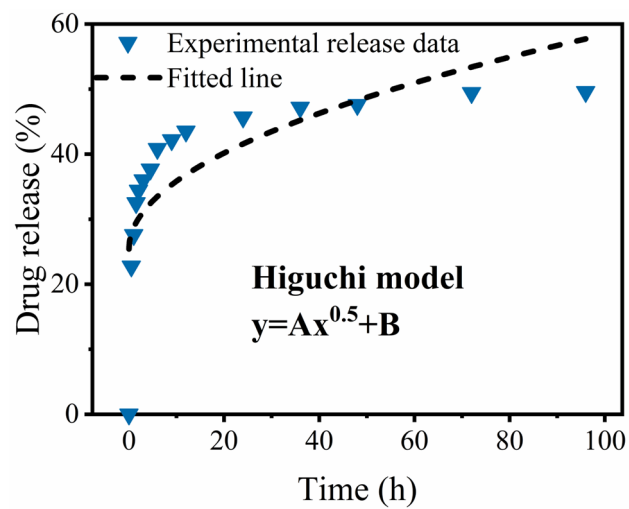

Figure S15 Pharmacokinetic simulation of 5-Fu@CPM-85 by Higuchi model



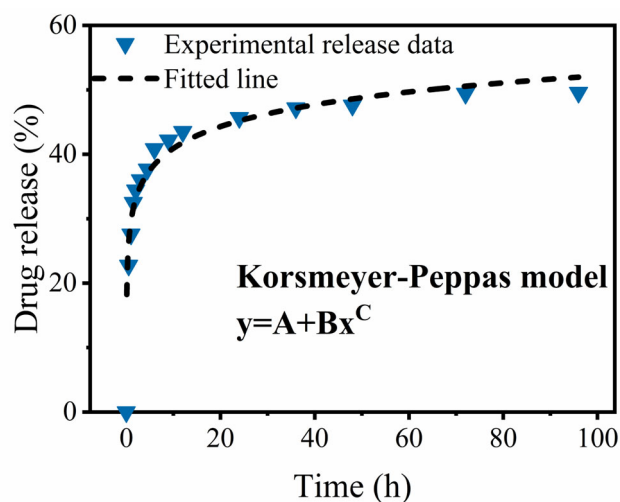

Figure S16 Pharmacokinetic simulation of 5-Fu@CPM-85 by Korsmeier-Peppas model

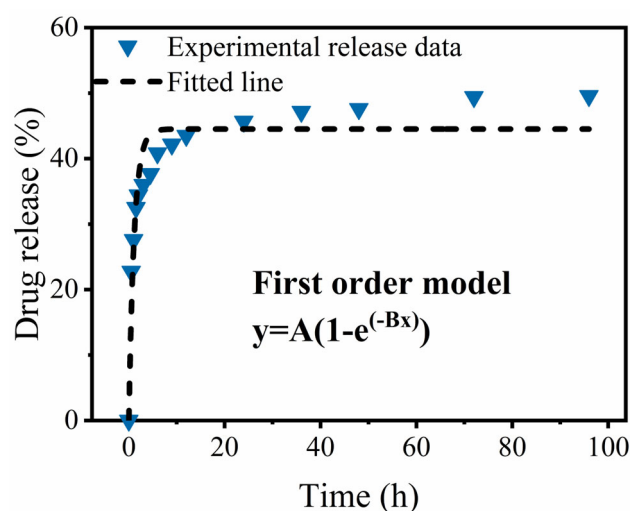

Figure S17 Pharmacokinetic simulation of 5-Fu@CPM-85 by first order model

Table S1 Summary of four types of kinetic model fitting tables for drug sustained release behavior under different pH conditions (5-Fu@CPM-83)

| pH=7.4 | Model             | Fitted Equations                                    | Correlation Coefficients(R <sup>2</sup> ) |
|--------|-------------------|-----------------------------------------------------|-------------------------------------------|
|        | First order       | $y=0.45113(1-e^{-0.16551x})$                        | 0.92938                                   |
|        | Hill              | $y=0.61664x^{0.6231}/(9.14866^{0.6231}+x^{0.6231})$ | 0.99237                                   |
|        | Higuchi           | $y=0.049556x^{0.5}+0.09407$                         | 0.87759                                   |
|        | Korsemeier-peppas | $y=-0.85434+0.98826x^{0.07138}$                     | 0.97917                                   |
| pH=6.8 | Model             | Fitted Equations                                    | Correlation Coefficients(R <sup>2</sup> ) |
|        | First order       | $y=0.47509(1-e^{-0.23989x})$                        | 0.92635                                   |

|                   |       |                                                        |                                           |
|-------------------|-------|--------------------------------------------------------|-------------------------------------------|
| Hill              |       | $y=0.62673x^{0.6339}/(9.14866^{0.6339}+x^{0.6339})$    | 0.99581                                   |
| Higuchi           |       | $y=0.05192x^{0.5}+0.11549$                             | 0.85944                                   |
| Korsemeyer-peppas |       | $y=-5.40825+5.5673x^{0.01479}$                         | 0.98647                                   |
| pH=1.5            | Model | Fitted Equations                                       | Correlation Coefficients(R <sup>2</sup> ) |
| First order       |       | $y=0.69693(1-e^{-0.21149x})$                           | 0.89666                                   |
| Hill              |       | $y=1.02327x^{0.55156}/(9.14866^{0.55156}+x^{0.55156})$ | 0.98905                                   |
| Higuchi           |       | $y=0.07634x^{0.5}+0.16602$                             | 0.86854                                   |
| Korsemeyer-peppas |       | $y=-1.73423+1.96659x^{0.05619}$                        | 0.98447                                   |

Table S2 Summary of four types of kinetic model fitting tables for drug sustained release behavior under different pH conditions (5-Fu@CPM-85)

|                   |       |                                                        |                                           |
|-------------------|-------|--------------------------------------------------------|-------------------------------------------|
| pH=7.4            | Model | Fitted Equations                                       | Correlation Coefficients(R <sup>2</sup> ) |
| First order       |       | $y=0.78788(1-e^{-1.0485x})$                            | 0.96695                                   |
| Hill              |       | $y=0.82685x^{1.05904}/(0.60126^{1.05904}+x^{1.05904})$ | 0.98849                                   |
| Higuchi           |       | $y=0.05185x^{0.5}+0.48279$                             | 0.42684                                   |
| Korsemeyer-peppas |       | $y=-257.490+258.048x^{2.9277E-4}$                      | 0.78362                                   |
| pH=6.8            | Model | Fitted Equations                                       | Correlation Coefficients(R <sup>2</sup> ) |
| First order       |       | $y=0.76357(1-e^{-0.63296x})$                           | 0.98019                                   |
| Hill              |       | $y=0.79895x^{1.1675}/(1.06502^{1.1675}+x^{1.1675})$    | 0.99455                                   |
| Higuchi           |       | $y=0.05877x^{0.5}+0.39575$                             | 0.51102                                   |
| Korsemeyer-peppas |       | $y=-1898.81+1899.26x^{5.145E-5}$                       | 0.80863                                   |
| pH=1.5            | Model | Fitted Equations                                       | Correlation Coefficients(R <sup>2</sup> ) |
| First order       |       | $y=0.44505(1-e^{-0.89049x})$                           | 0.90648                                   |
| Hill              |       | $y=0.52199x^{0.58313}/(0.74196^{0.58313}+x^{0.58313})$ | 0.99747                                   |
| Higuchi           |       | $y=0.03295x^{0.5}+0.2543$                              | 0.54657                                   |
| Korsemeyer-peppas |       | $y=-777.925+778.222x^{6.2757E-5}$                      | 0.94960                                   |

## 6. Cell viability test

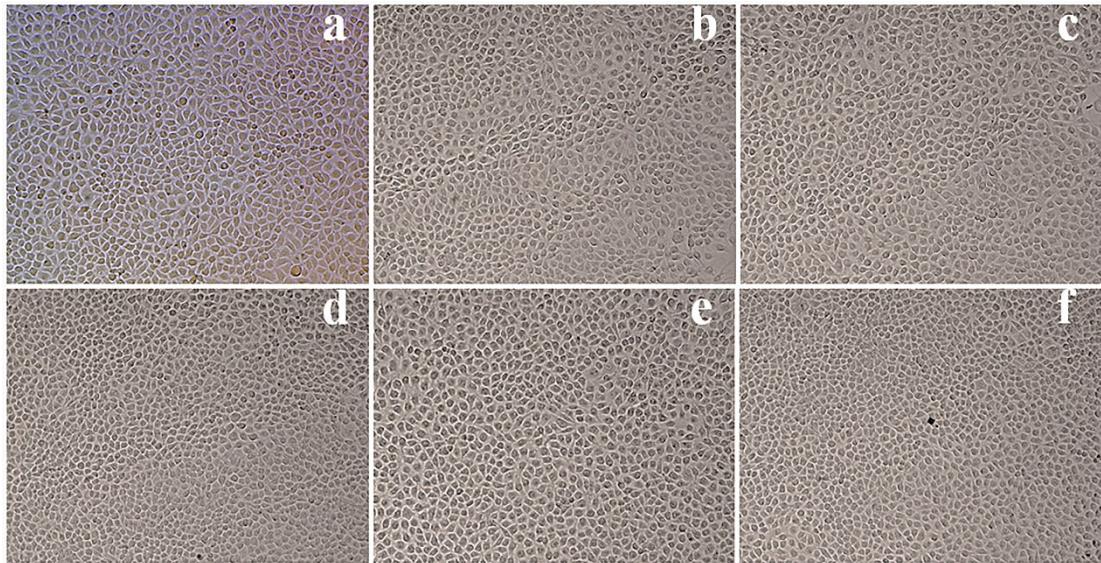

Figure S18 The L929 cell morphology after treated with different concentration of CPM-83, (a) Control, (b) 20µg/ml, (c) 40µg/ml, (d) 60µg/ml, (e) 80µg/ml, (f)100µg/ml

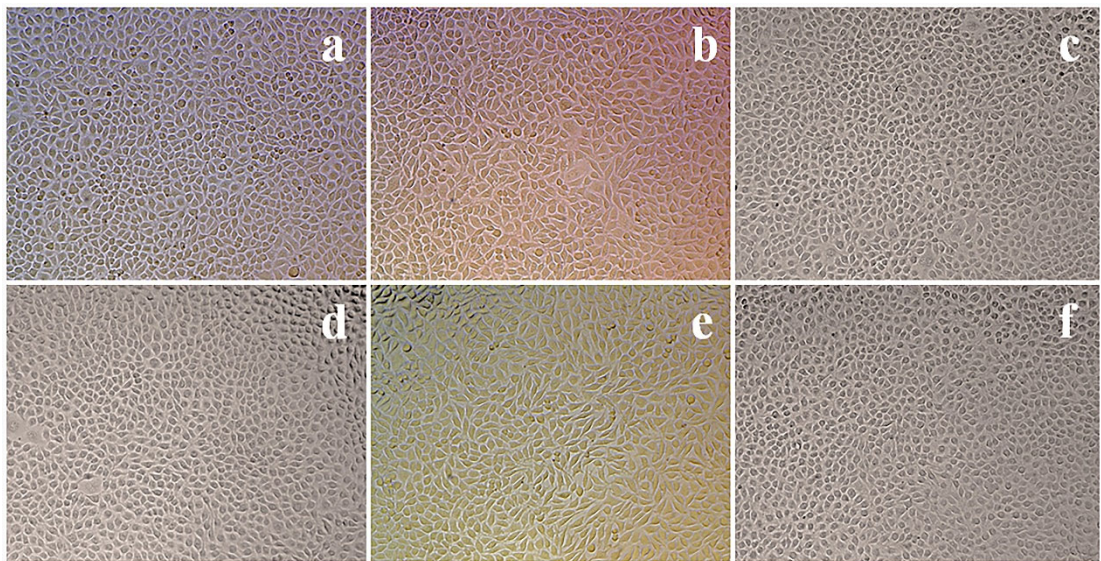

Figure S19 The L929 cell morphology after treated with different concentration of CPM-85, (a) Control, (b) 20µg/ml, (c) 40µg/ml, (d) 60µg/ml, (e) 80µg/ml, (f)100µg/ml

## 7. X-ray powder diffraction after drug release

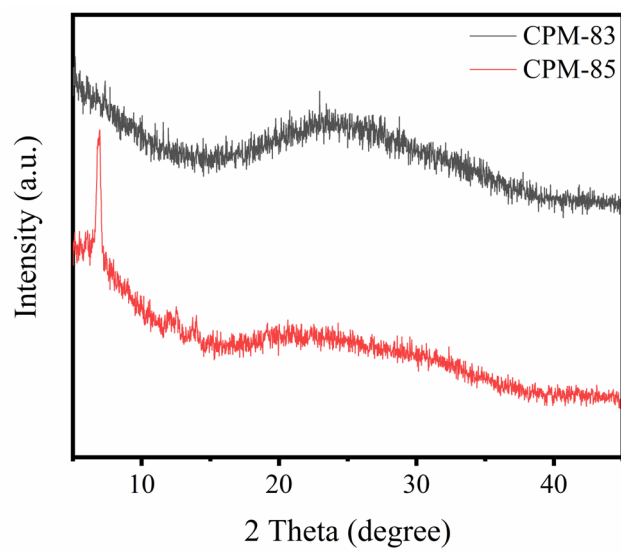

Figure S20 X-ray powder diffraction of CPM-83 and CPM-85 after drug release
